# Supplementary material
Source: PubMed Central journal article supplement (PMC8130056)

Figure S1

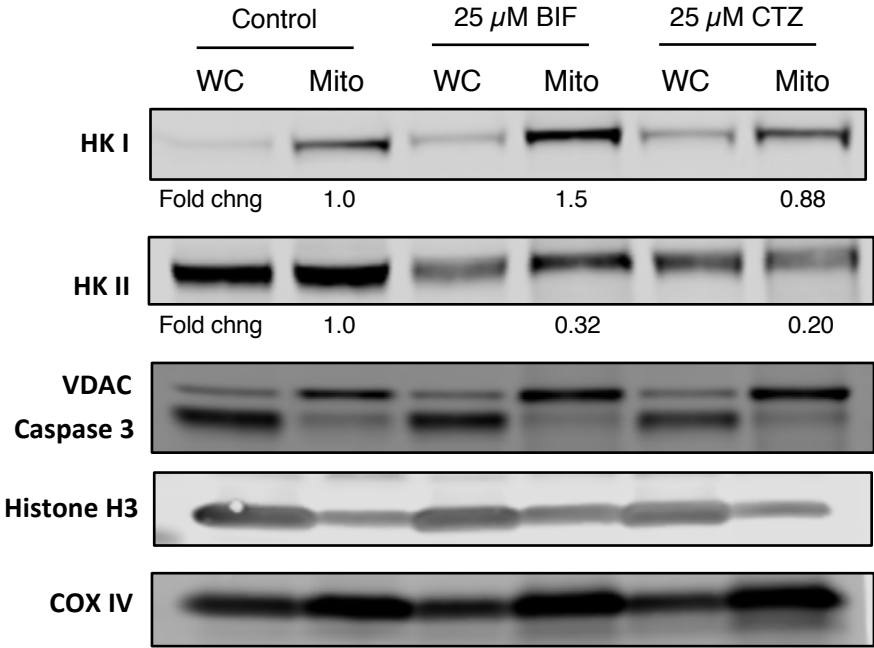

Supplement: NIHMS1696873-supplement-Supple_fig.pdf [file NIHMS1696873-supplement-Supple_fig.pdf]
